# Supplementary material for: Clinical Breakpoint of Apramycin to Swine Salmonella and Its Effect on Ileum Flora
Source: MDPI journal article supplement (doi:10.3390/ijms23031424), 2022-01-26
Supplement: s1 [file s1]

Supplementary data

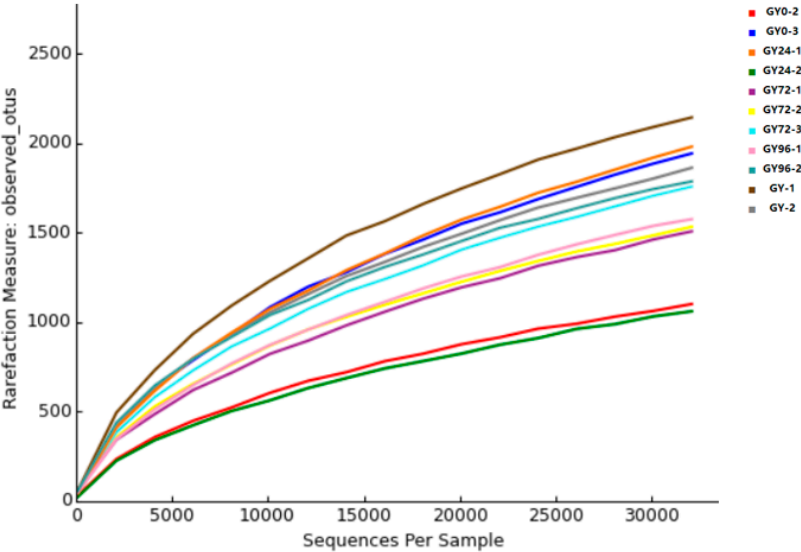

Figure S1. Rarefaction curves of the OTU number in the ileal contents samples.

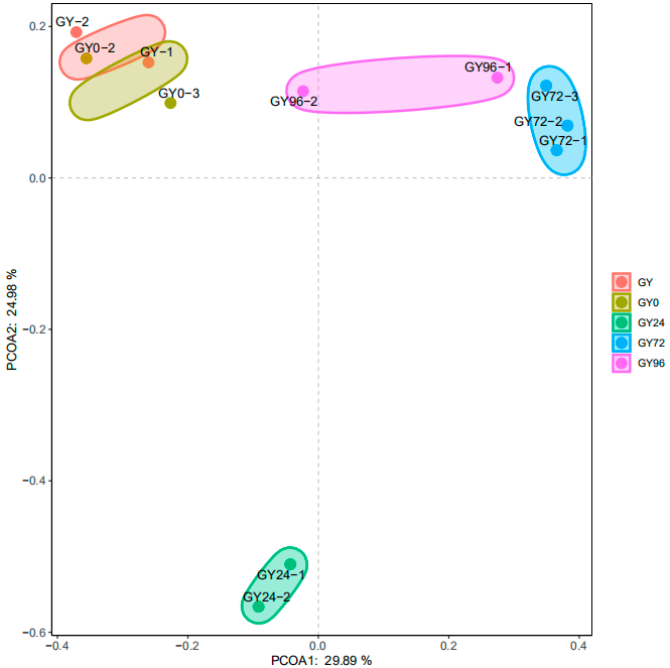

Figure S2. Principal coordinate analysis (PCoA) shows the ileal microbiota of the healthy, infection, treatment, cure and withdraw period group.

**Table S1. Statistics of antibacterial activity of APR against swine *Salmonella*.**

| MIC( µg/mL) | NO. strain |       |       |       |       |       | Total |
|-------------|------------|-------|-------|-------|-------|-------|-------|
| 4           | 4759       | 1880  | 279   | 8515  | 7897  | 6604  | 22    |
|             | 7900       | 8515  | 9288  | 9862  | 277-1 | 9105  |       |
|             | 8519       | 6#    | 3303  | 10016 | 250j  | 10234 |       |
|             | 9727       | 9530  | 10454 | 9#    |       |       |       |
|             | 8414       | 7963  | 1957  | 9727  | 6602  | 1959  |       |
|             | 8515       | 7897  | 23#   | 9505  | 6604  | 9104  |       |
|             | 2088       | 1939  | 8287  | 246j  | 10315 | 9899  |       |
|             | 9504       | 4433  | 9503  | 252-1 | 8771  | 251   |       |
|             | 9862       | 7968  | 10025 | 7900  | 9105  | 9727  |       |
|             | 7904       | 10455 | 9790  | 9387  | 293   | 1#    |       |
|             | 10#        | 10314 | 1959  | 9530  | 10#   | 9434  |       |
|             | 8997       | 3#    | 7964  | 293   | 9286  | 4776  |       |
|             | 7903       | 9103  | 9848  | 8447  | 12#   | 349   |       |
|             | 7904       | 9504  | 4447  | 8091  | 7897  | 253j  |       |
|             | 9227       | 295   | 277-2 | 8#    | 10025 | 3297  |       |
| 8           | 10318      | 4414  | 10234 | 467   | 3801  | 2481  | 141   |
|             | 3#         | 6601  | 9103  | 6#    | 10316 | 210-1 |       |
|             | 10643      | 1957  | 3471  | 9434  | 2087  | 1822a |       |
|             | 8447       | 9508  | 9287  | 9286  | 2891  | 6220  |       |
|             | C77-31     | C78-4 | 6883  | 2001  | 2883  | 2116  |       |
|             | 8398       | 2932  | 6410  | 7227  | 8913  | 11#   |       |
|             | 3827       | 9289  | 8997  | 10312 | 9#    | 4782  |       |
|             | 7913       | 12#   | 0596  | 215-1 | 9530  | 9643  |       |
|             | 9849       | 7204  | 8019  | 8518  | 10316 | 2932  |       |
|             | 4444       | 4435  | 284   | 8400  | 6433  | 2372  |       |
|             | 7889       | 6380  | 8518  | 6605  | 5062  | 277-2 |       |
|             | 6433       | 9599  | 8772  | 9436  | 4439  | 8#    |       |
|             | 251        | 7892  | 6391  |       |       |       |       |
| 16          | 10642      | 1990  | 34#   |       |       |       | 3     |
| 32          | 10642      | 279   | 283   |       |       |       | 3     |
| 128         | 0596       |       |       |       |       |       | 1     |
| >256        | 8777       | 5023  | 8913  | 251   | 5023  | 5062  | 13    |
|             | 6220       | 10024 | 7227  | 2814  | 4776  | 8001  |       |
|             | 7904       |       |       |       |       |       |       |

**Table S2. The PAE of APR against swine *Salmonella*.**

| APR concentration (µg/mL) | PAE(h)      |             |
|---------------------------|-------------|-------------|
|                           | Exposure 1h | Exposure 2h |
| 1×MIC                     | 0.51        | 0.45        |
| 2×MIC                     | 0.66        | 1.25        |
| 4×MIC                     | 1.42        | 6           |

**Table S3. Concentrations of APR in swine plasma after a single dose administration.**

| Time(h) | Concentration (µg/mL) |                 |
|---------|-----------------------|-----------------|
|         | Healthy group         | Infection group |
| 0.5     | 0.08±0.02             | 0.13±0.01       |
| 1       | 0.23±0.01             | 0.21±0.01       |
| 2       | 0.23±0.03             | 0.22±0.02       |
| 4       | 0.26±0.03             | 0.24±0.03       |
| 6       | 0.18±0.01             | 0.17±0.02       |
| 8       | 0.14±0.04             | 0.12±0.02       |
| 10      | 0.11±0.02             | 0.09±0.01       |
| 12      | 0.05±0.01             | 0.04±0.01       |
| 24      | 0.04±0.01             | 0.02±0.02       |
| 48      | -                     | -               |

**Note:** The concentrations of APR was lower than the limit of quantitation of the method.

**Table S4. Concentrations of APR in swine ileum fluid after a single dose administration.**

| Time(h) | Concentration (µg/mL) |                 |
|---------|-----------------------|-----------------|
|         | Healthy group         | Infection group |
| 0.5     | 3.5±0.57              | 2.7±0.28        |
| 1       | 21.8±1.31             | 20.1±1.23       |
| 2       | 356.1±21.15           | 259.6±19.32     |
| 3       | 863.4±20.22           | 750.5±18.98     |
| 4       | 566.5±18.92           | 470.6±20.33     |
| 6       | 263.3±8.9             | 260.9±15.32     |
| 8       | 91.8±4.32             | 84.7±9.32       |
| 10      | 70.4±11.2             | 64.7±14.2       |
| 12      | 25.5±9.1              | 20.2±3.22       |
| 24      | 7.2±2.3               | 7.9±1.21        |
| 48      | 3.4±0.9               | 1.6±0.32        |

**Table S5. PTA of APR against swine *Salmonella* at different MICs.**

| MIC(µg/mL) | PTA(%) |
|------------|--------|
| 8          | 100    |
| 16         | 100    |
| 32         | 100    |
| 48         | 90     |
| 64         | 0      |

**Table S6. Probability of cure (POC) of APR against swine *Salmonella*.**

| Group     | MIC       | Total | Mortality | Mortality rate | Effective rate | POC    |
|-----------|-----------|-------|-----------|----------------|----------------|--------|
| Blank     | -         | 6     | 0         | 0              | -              | -      |
| Infection | 8 µg/mL   | 6     | 2         | 33.33%         | -              | -      |
|           | 4 µg/mL   | 6     | 0         | 0              | 100%           | 100%   |
| Treatment | 8 µg/mL   | 6     | 0         | 0              | 100%           | 100%   |
|           | 16 µg/mL  | 6     | 1         | 16.67%         | 83.33%         | 83.33% |
|           | 32 µg/mL  | 6     | 1         | 16.67%         | 83.33%         | 66.67% |
|           | 256 µg/mL | 6     | 2         | 33.33%         | 66.67%         | 66.67% |

**Table S7. Statistics of KEGG pathway at level 2 and the total sequences contained in each sample.**

| Sample ID | Number of seqs | Number of OUTs |
|-----------|----------------|----------------|
| GY-1      | 32867          | 2165           |
| GY-2      | 46923          | 2171           |
| GY0-2     | 74959          | 1570           |
| GY0-3     | 49914          | 2345           |
| GY24-1    | 62300          | 2638           |
| GY24-2    | 80035          | 1675           |
| GY72-1    | 43435          | 1748           |
| GY72-2    | 48936          | 1828           |
| GY72-3    | 52285          | 2151           |
| GY96-1    | 42356          | 1775           |
| GY96-2    | 35374          | 1862           |

**Table S8. Statistics of predicted KEGG pathway at level 2.**

| Taxonomy                             | GY        | GY0       | GY24      | GY72      | GY96      |
|--------------------------------------|-----------|-----------|-----------|-----------|-----------|
| Amino acid metabolism                | 103685.67 | 162575.55 | 181753.30 | 132447.10 | 110417.07 |
| Carbohydrate metabolism              | 94926.63  | 151329.46 | 153340.79 | 118311.85 | 103352.12 |
| Metabolism of cofactors and vitamins | 91562.96  | 129904.87 | 156523.41 | 110035.48 | 90771.68  |
| Metabolism of other amino acids      | 64371.93  | 97016.16  | 104714.22 | 79498.50  | 68982.66  |
| Biosynthesis of other secondary      | 56935.88  | 89101.25  | 99384.26  | 74338.36  | 62024.94  |

|                                           |          |          |           |          |          |
|-------------------------------------------|----------|----------|-----------|----------|----------|
| metabolites                               |          |          |           |          |          |
| Global and overview maps                  | 56649.88 | 88656.09 | 101255.76 | 71141.48 | 59469.47 |
| Replication and repair                    | 52942.87 | 84145.45 | 92841.42  | 64031.13 | 54996.90 |
| Glycan biosynthesis and metabolism        | 42955.01 | 59068.49 | 56796.53  | 48997.44 | 42309.45 |
| Lipid metabolism                          | 42900.59 | 64979.65 | 70279.29  | 53460.16 | 45099.32 |
| Energy metabolism                         | 42817.46 | 66812.19 | 72976.28  | 53356.44 | 45185.59 |
| Translation                               | 31056.01 | 49081.10 | 54388.67  | 38257.99 | 30912.96 |
| Folding, sorting and degradation          | 28255.08 | 44572.40 | 54531.45  | 35700.37 | 29482.04 |
| Xenobiotics biodegradation and metabolism | 26359.12 | 35974.79 | 39094.59  | 34334.58 | 30907.46 |
| Metabolism of terpenoids and polyketides  | 26186.11 | 41273.22 | 39939.94  | 31980.04 | 27281.01 |
| Cell motility                             | 23080.22 | 50208.25 | 27069.81  | 25009.78 | 23777.55 |
| Drug resistance: antimicrobial            | 20364.23 | 32558.71 | 34149.08  | 24379.87 | 21217.97 |
| Cell growth and death                     | 19257.36 | 29396.20 | 32477.47  | 23731.00 | 20218.96 |
| Nucleotide metabolism                     | 15858.81 | 24395.62 | 26759.13  | 19172.69 | 15987.62 |
| Membrane transport                        | 14837.85 | 24553.73 | 23538.08  | 18750.94 | 17022.08 |
| Cellular community - prokaryotes          | 12847.13 | 20559.25 | 20661.76  | 15469.64 | 12965.96 |
| Endocrine system                          | 8857.73  | 12834.73 | 15283.71  | 10647.59 | 8832.28  |
| Drug resistance: antineoplastic           | 8273.63  | 12750.24 | 13167.54  | 9577.59  | 8291.52  |
| Signal transduction                       | 8145.05  | 12747.69 | 12644.18  | 9707.46  | 8596.66  |
| Cancer: overview                          | 5150.56  | 8189.85  | 8318.22   | 6236.32  | 5564.74  |
| Infectious disease: bacterial             | 4992.47  | 7349.36  | 7032.68   | 5846.99  | 5050.03  |
| Aging                                     | 4786.04  | 6777.10  | 6521.97   | 4999.96  | 4393.88  |
| Endocrine and metabolic disease           | 4312.13  | 6771.01  | 7745.54   | 5410.71  | 4386.06  |
| Transcription                             | 3095.10  | 4791.62  | 5509.72   | 4072.85  | 3136.03  |
| Transport and catabolism                  | 2850.55  | 3503.01  | 4059.20   | 3261.90  | 2732.52  |
| Immune system                             | 2732.40  | 4557.95  | 5179.47   | 3276.91  | 2799.25  |
| Nervous system                            | 2450.44  | 4335.19  | 5076.74   | 3141.24  | 2811.08  |

|                                        |         |         |         |         |         |
|----------------------------------------|---------|---------|---------|---------|---------|
| Environmental adaptation               | 1734.72 | 2847.27 | 2864.20 | 2023.44 | 1750.07 |
| Cardiovascular disease                 | 1644.54 | 2512.49 | 3084.11 | 2206.41 | 1844.49 |
| Digestive system                       | 1456.64 | 1131.12 | 858.00  | 1349.99 | 977.72  |
| Chemical structure transformation maps | 1366.00 | 560.50  | 1230.00 | 3964.67 | 4233.00 |
| Neurodegenerative disease              | 1199.29 | 1914.59 | 1160.65 | 1279.58 | 1312.53 |
| Excretory system                       | 1132.61 | 1436.00 | 1321.68 | 996.64  | 1115.54 |
| Immune disease                         | 1109.01 | 1737.41 | 943.44  | 1444.78 | 1080.89 |
| Cancer: specific types                 | 860.74  | 1192.18 | 1202.98 | 1078.22 | 983.50  |
| Infectious disease: parasitic          | 383.48  | 265.30  | 237.13  | 540.28  | 478.75  |
| Infectious disease: viral              | 219.56  | 329.67  | 338.02  | 440.93  | 299.46  |
| Substance dependence                   | 59.23   | 76.55   | 44.18   | 146.27  | 136.18  |

**Table S9. Primer used for identification of virulence genes of *Salmonella*.**

| Gene Name    | Premers         | Sequences(5' -3' )       | Sizes (bp) |
|--------------|-----------------|--------------------------|------------|
| <i>spvB</i>  | <i>spvB</i> -F  | GCTGTTACCCCTAGTGTGTTGAC  | 811        |
|              | <i>spvB</i> -R  | GCTGTTACCCCTAGTGTGTTGAC  |            |
| <i>spvR</i>  | <i>spvR</i> -F  | CGCTACGCCTTTGATGTGC      | 337        |
|              | <i>spvR</i> -R  | TCGGGAATCGCTTGTCTGC      |            |
| <i>avrA</i>  | <i>avrA</i> -F  | CCTGTATTGTTGAGCGTCTGG    | 425        |
|              | <i>avrA</i> -R  | AGAAGAGCTTCGTTGAATGTCC   |            |
| <i>ssaQ</i>  | <i>ssaQ</i> -F  | GGGGGAATCTACGCAAGGG      | 235        |
|              | <i>ssaQ</i> -R  | CACCTACAGGCAAAACGTCC     |            |
| <i>sopE1</i> | <i>sopE1</i> -F | ACTCCTTGACACAACCAATGCGGA | 527        |
|              | <i>sopE1</i> -R | CTGTCTCTGCATTTGCCACC     |            |
| <i>fljB</i>  | <i>fljB</i> -F  | ATGGCACAAGTCATTAATACAAAC | 1515       |
|              | <i>fljB</i> -R  | ACGCAGTAAAGAGAGGAC       |            |

**Table S10. Volume of reagent for multiple PCR (μL) .**

| Components | 2×Taq Master Mix | Template | F-premer | R-premer | ddH <sub>2</sub> O | Total |
|------------|------------------|----------|----------|----------|--------------------|-------|
| Volume     | 12.5             | 2        | 1        | 1        | 8.5                | 25    |

**Note:** The procedure was pre denaturation at 95 °C for 3min, denaturation at 95 °C for 15s, annealing at 55 °C for 15s, extension at 72 °C for 30s, amplification for 30 cycles, and final extension at 72 °C for 5min.
